# Supplementary material for: Neuroprotective effects of fermented yak milk-derived peptide LYLKPR on H2O2-injured HT-22 cells
Source: Royal Society of Chemistry journal article supplement (doi:10.1039/d2fo02131e), 2022-01-01
Supplement: d2fo02131e1.pdf [file d2fo02131e1.pdf]

**Supplementary figure**

**Figure S1** (A) Secondary mass spectrum of (a) ELPP (b) FDGDF (c) LYLKPR (d) LGDKKLF (e) KLLVAWVPP. (B) Structural formula of (a) ELPP (b) FDGDF (c) LYLKPR (d) LGDKKLF (e) KLLVAWVPP.

**Figure S2** The binding mode of Keap-1 with LYLKPR.

A

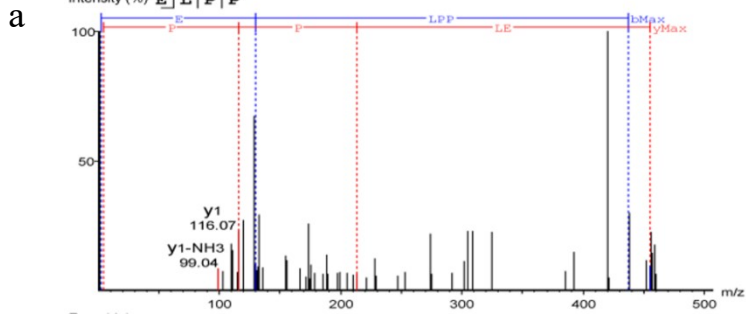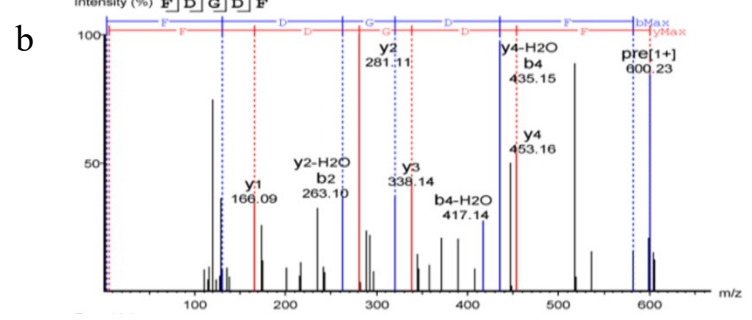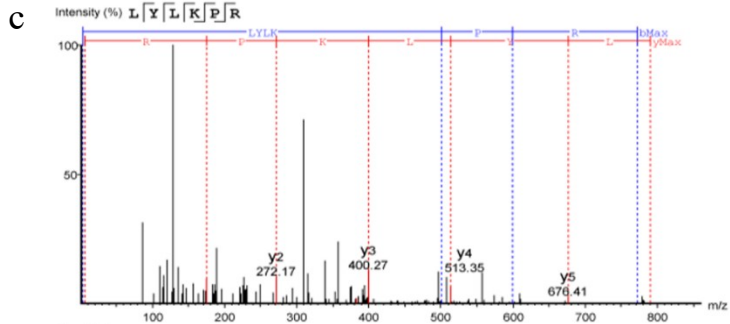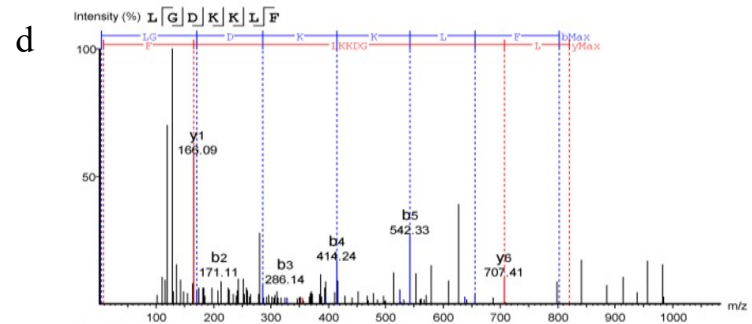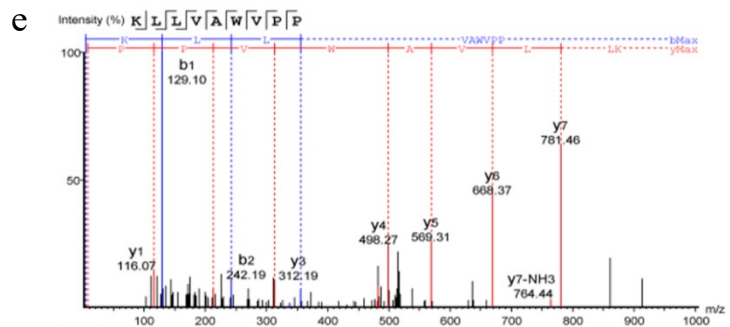

B

a

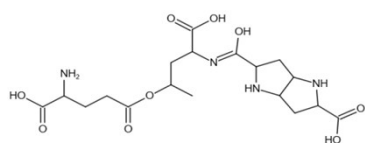

b

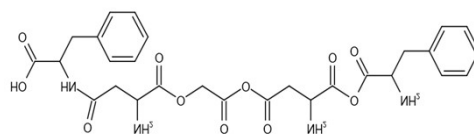

c

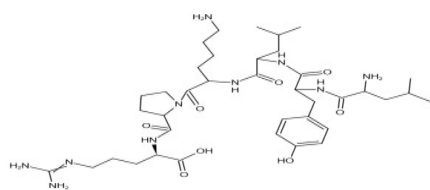

d

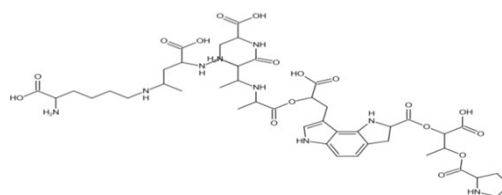

e

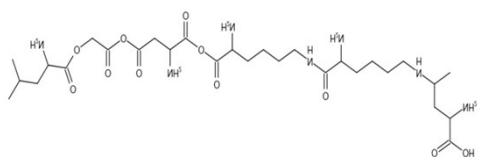

Figure S1

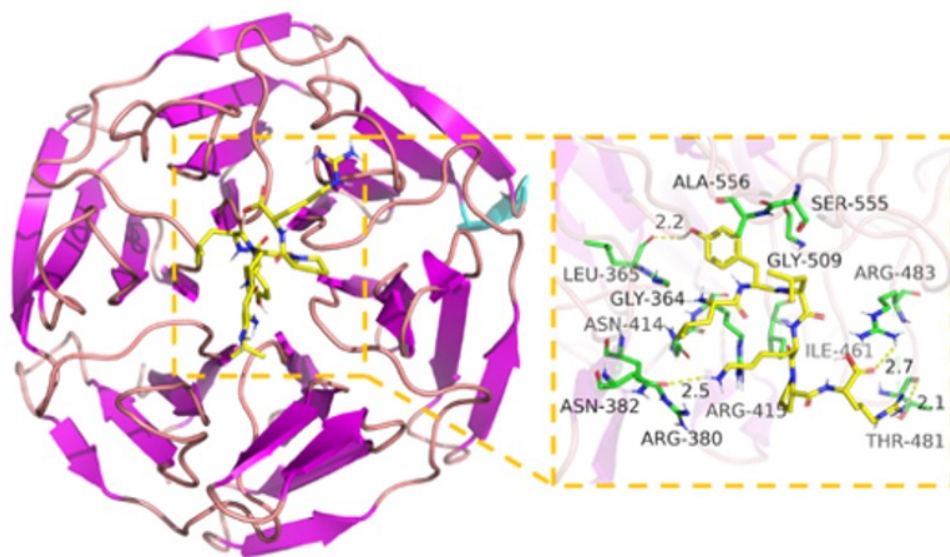

Figure S2
